# Supplementary material for: A catchment and location-allocation analysis of mammography access in Delaware, US: implications for disparities in geographic access to breast cancer screening
Source: PubMed Central journal article supplement (PMC10631173; doi:10.1186/s13058-023-01738-w), 2023-11-08

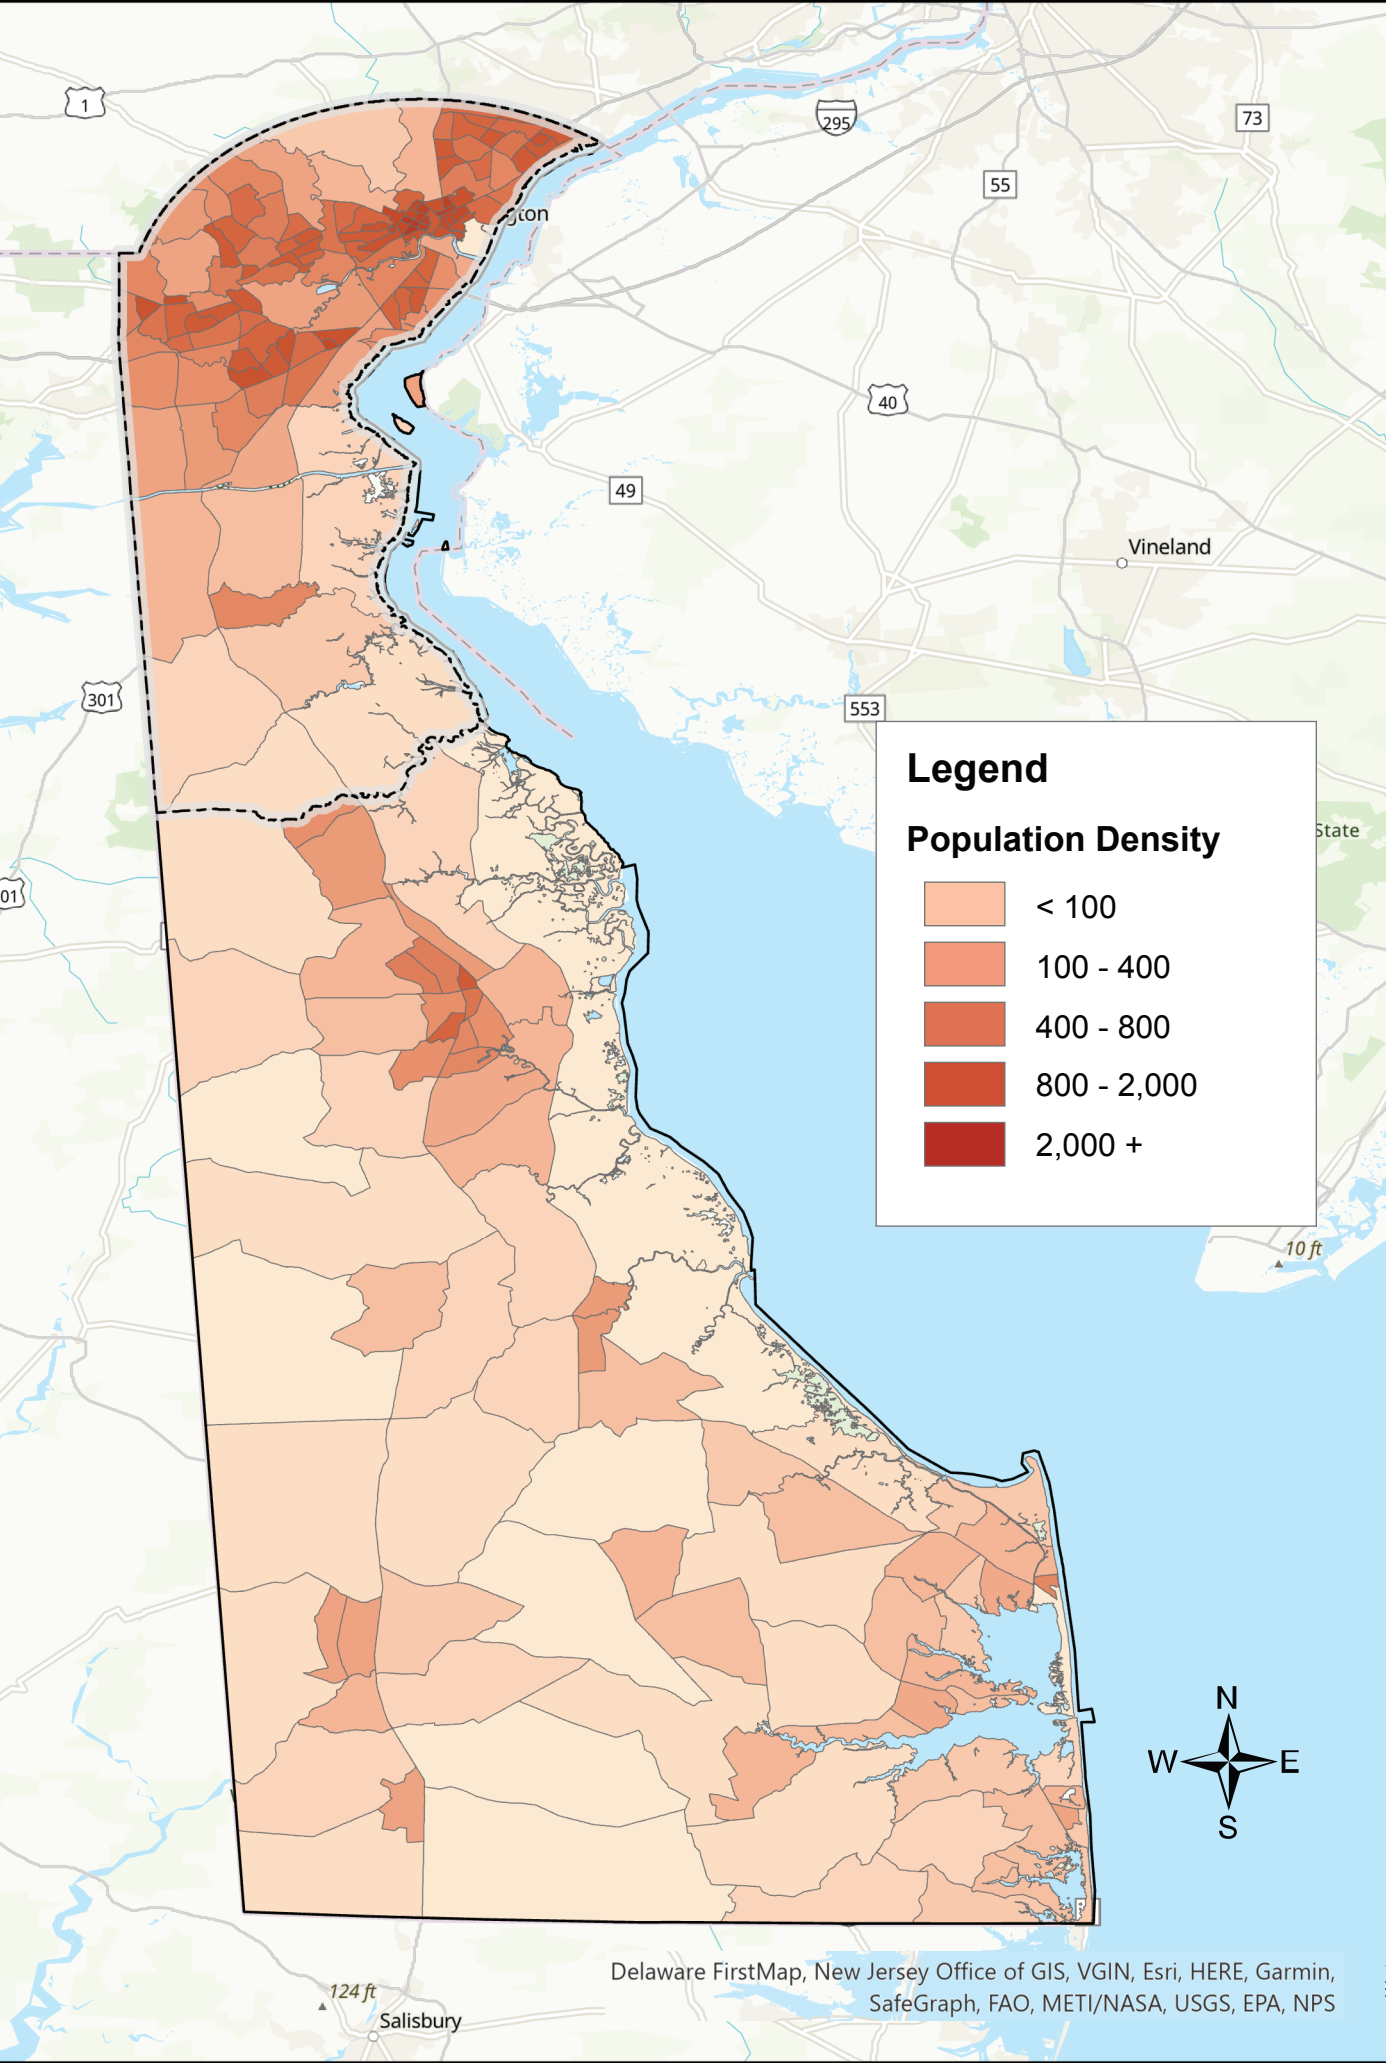

## Legend

### Population Density

- < 100
- 100 - 400
- 400 - 800
- 800 - 2,000
- 2,000 +

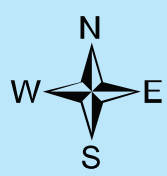

Supplement: 13058_2023_1738_MOESM1_ESM.pdf [file 13058_2023_1738_MOESM1_ESM.pdf]
