# Supplementary material for: A catchment and location-allocation analysis of mammography access in Delaware, US: implications for disparities in geographic access to breast cancer screening
Source: PubMed Central journal article supplement (PMC10631173; doi:10.1186/s13058-023-01738-w), 2023-11-08
Supplement: 13058_2023_1738_MOESM2_ESM.pdf [file 13058_2023_1738_MOESM2_ESM.pdf]

# Location-allocation demand: US Preventive Services Task Force

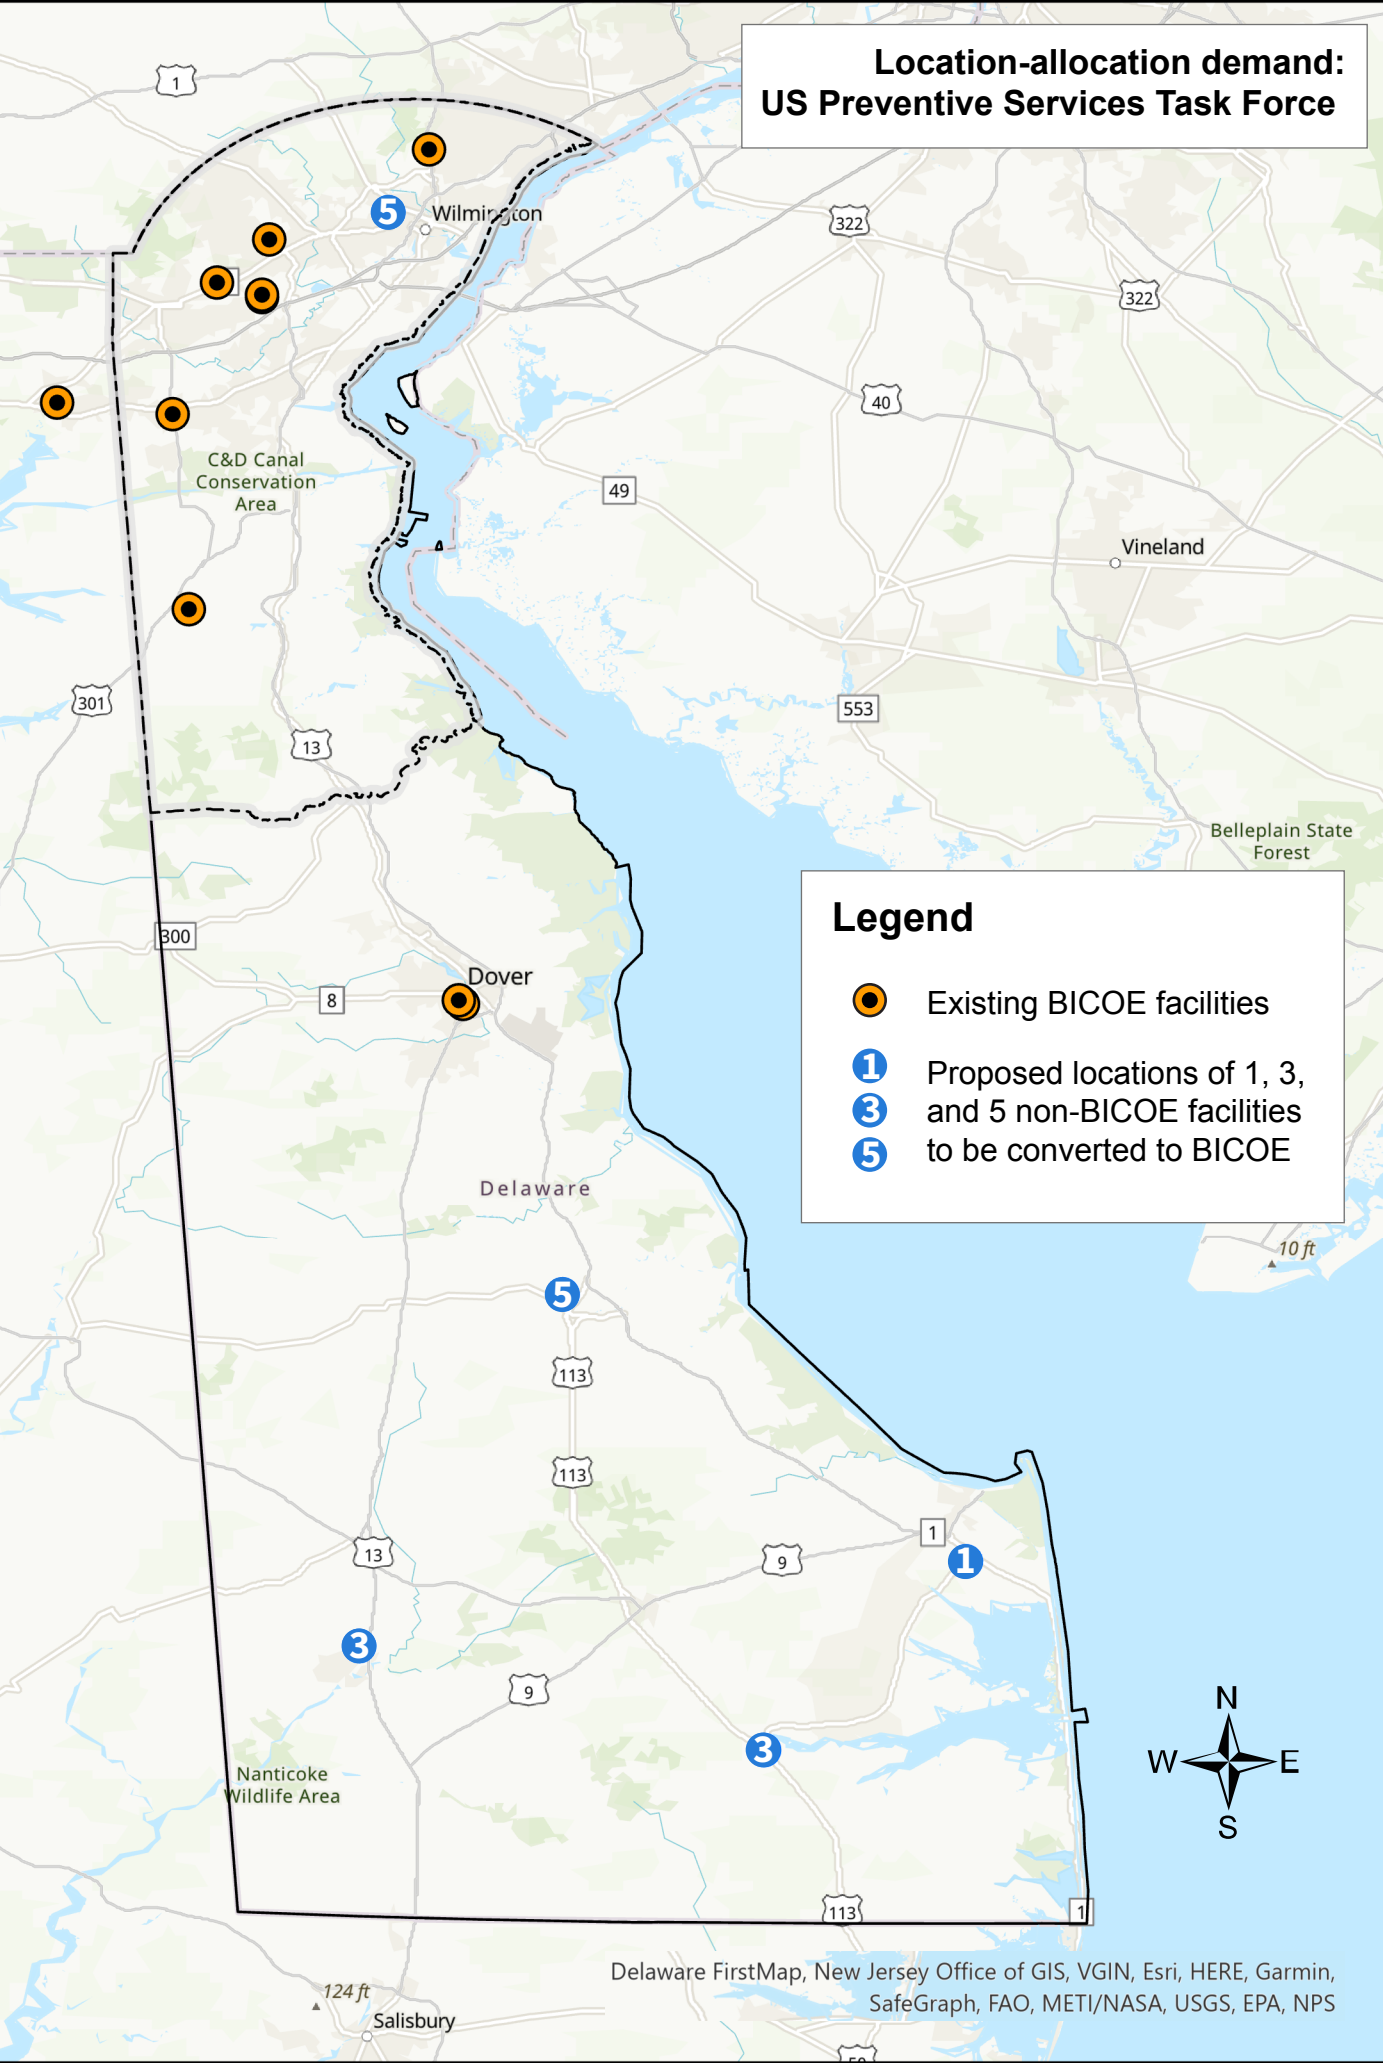

## Legend

- Existing BICOE facilities
- Proposed locations of 1, 3, and 5 non-BICOE facilities to be converted to BICOE
